# Supplementary material for: Thermally-treated MgO/nanocrystalline cellulose immobilized onto a Santa Barbara-16 mesoporous SiO2 template for the sequestration of antibiotics from polluted water
Source: Royal Society of Chemistry journal article supplement (doi:10.1039/d2nj03611h), 2022-01-01
Supplement: d2nj03611h1.pdf [file d2nj03611h1.pdf]

# **Thermally treated MgO/nanocrystalline cellulose immobilized onto Santa Barbara-16 mesoporous SiO<sub>2</sub> template for sequestration of antibiotics from polluted water**

**Martins O. Omorogie<sup>1,2,3,‡</sup>, Faith O. Ilesanmi<sup>1,2</sup>, Moses O. Alfred<sup>1,2</sup>, Brigitte Helmreich<sup>3</sup>**

<sup>1</sup>Department of Chemical Sciences, Faculty of Natural Sciences, Redeemer's University, P.M.B. 230, Ede, 232101, Nigeria

<sup>2</sup>Water Science and Technology Research Unit, African Centre of Excellence for Water and Environmental Research (ACEWATER), Redeemer's University, P.M.B. 230, Ede, 232101, Nigeria

<sup>3</sup>Chair of Urban Water Systems Engineering, Technical University of Munich (TUM), Am Coulombwall 3, 85748, Garching, Germany

<sup>‡</sup>*Corresponding Author:* [omorogiem@run.edu.ng](mailto:omorogiem@run.edu.ng), [mo.omorogie@tum.de](mailto:mo.omorogie@tum.de)

**Electronic Supplementary Information (ESI)**

## Tables

Table S1: Equilibrium table for AMP by MNCS-450, MNCS-650 and MNCS-850.

| Adsorbents                                                         | MNCS-450 |       |       | MNCS-650 |       |       | MNCS-850 |       |       |
|--------------------------------------------------------------------|----------|-------|-------|----------|-------|-------|----------|-------|-------|
| Temperatures                                                       | 25 °C    | 40 °C | 55 °C | 25 °C    | 40 °C | 55 °C | 25 °C    | 40 °C | 55 °C |
| FM                                                                 |          |       |       |          |       |       |          |       |       |
| $1/n$                                                              | 1.129    | 1.283 | 2.592 | 0.722    | 0.837 | 0.926 | 1.055    | 1.135 | 1.321 |
| $K_F$ (mg.g <sup>-1</sup> )(L.mg <sup>-1</sup> ) <sup>1/n</sup>    | 0.642    | 1.285 | 2.294 | 1.874    | 2.016 | 2.381 | 2.677    | 2.544 | 2.879 |
| $r^2$                                                              | 0.923    | 0.939 | 0.942 | 0.887    | 0.940 | 0.990 | 0.814    | 0.903 | 0.968 |
| LM                                                                 |          |       |       |          |       |       |          |       |       |
| $q_{\max_L}$ (mg.g <sup>-1</sup> )                                 | 3.622    | 3.791 | 3.973 | 3.890    | 4.260 | 4.413 | 4.089    | 4.460 | 4.613 |
| $K_L$ (L.mg <sup>-1</sup> )                                        | 0.002    | 0.013 | 0.078 | 0.003    | 0.017 | 0.028 | 0.097    | 0.116 | 0.393 |
| $r^2$                                                              | 0.927    | 0.951 | 0.963 | 0.931    | 0.937 | 0.970 | 0.972    | 0.978 | 0.986 |
| LFM                                                                |          |       |       |          |       |       |          |       |       |
| $q_{\max_{LF}}$ (mg.g <sup>-1</sup> )                              | 3.527    | 3.840 | 4.147 | 4.053    | 4.241 | 4.382 | 4.226    | 4.587 | 4.888 |
| $K_{LF}$ (mg.g <sup>-1</sup> )(L.mg <sup>-1</sup> ) <sup>1/n</sup> | 0.838    | 1.489 | 2.130 | 0.634    | 2.533 | 2.690 | 2.710    | 2.722 | 3.071 |
| $n_{LF}$                                                           | 0.119    | 0.304 | 0.333 | 0.525    | 0.699 | 0.748 | 0.633    | 0.818 | 1.273 |
| $r^2$                                                              | 0.991    | 0.992 | 0.994 | 0.995    | 0.996 | 0.998 | 0.992    | 0.994 | 0.995 |

Table S2: Kinetic table for AMP by MNCS-450, MNCS-650 and MNCS-850.

|                                                   | AMP      |          |          |
|---------------------------------------------------|----------|----------|----------|
|                                                   | MNCS-450 | MNCS-650 | MNCS-850 |
| PFOM                                              |          |          |          |
| $q_e$ (mg g <sup>-1</sup> )                       | 3.309    | 4.020    | 4.500    |
| $k_1$ (min <sup>-1</sup> )                        | 0.146    | 0.173    | 0.162    |
| $r^2$                                             | 0.973    | 0.988    | 0.932    |
| PSOM                                              |          |          |          |
| $q_e$ (mg g <sup>-1</sup> )                       | 3.514    | 4.404    | 4.639    |
| $k_2$ (g mg <sup>-1</sup> min <sup>-1</sup> )     | 0.035    | 0.046    | 0.044    |
| $r^2$                                             | 0.989    | 0.990    | 0.992    |
| MOM                                               |          |          |          |
| $q_e$ (mg g <sup>-1</sup> )                       | 3.657    | 4.574    | 4.838    |
| $k_{1,2}$ (g mg <sup>-1</sup> min <sup>-1</sup> ) | 0.032    | 0.106    | 0.060    |
| $\eta$                                            | 0.839    | 0.494    | 0.958    |
| $r^2$                                             | 0.999    | 0.999    | 0.999    |

Table S3: Kinetic table for CIP by MNCS-450, MNCS-650 and MNCS-850.

|                                                   | CIP      |          |          |
|---------------------------------------------------|----------|----------|----------|
|                                                   | MNCS-450 | MNCS-650 | MNCS-850 |
| PFOM                                              |          |          |          |
| $q_e$ (mg g <sup>-1</sup> )                       | 3.360    | 3.711    | 4.523    |
| $k_1$ (min <sup>-1</sup> )                        | 0.035    | 0.027    | 0.021    |
| $r^2$                                             | 0.904    | 0.946    | 0.931    |
| PSOM                                              |          |          |          |
| $q_e$ (mg g <sup>-1</sup> )                       | 3.549    | 3.835    | 4.630    |
| $k_2$ (g mg <sup>-1</sup> min <sup>-1</sup> )     | 0.039    | 0.036    | 0.042    |
| $r^2$                                             | 0.988    | 0.989    | 0.989    |
| MOM                                               |          |          |          |
| $q_e$ (mg g <sup>-1</sup> )                       | 3.640    | 3.906    | 4.891    |
| $k_{1,2}$ (g mg <sup>-1</sup> min <sup>-1</sup> ) | 0.009    | 0.006    | 0.008    |
| $\eta$                                            | 0.095    | 0.092    | 0.093    |
| $r^2$                                             | 0.997    | 0.998    | 0.999    |

## Figures

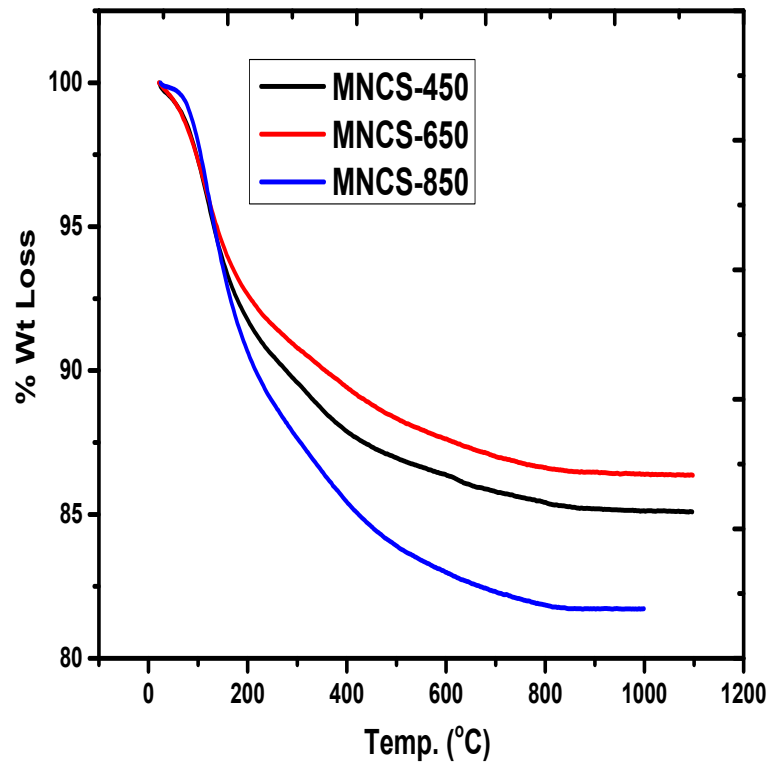

*Figure S1: TGA plots for MNCS-450, MNCS-650 and MNCS-850.*

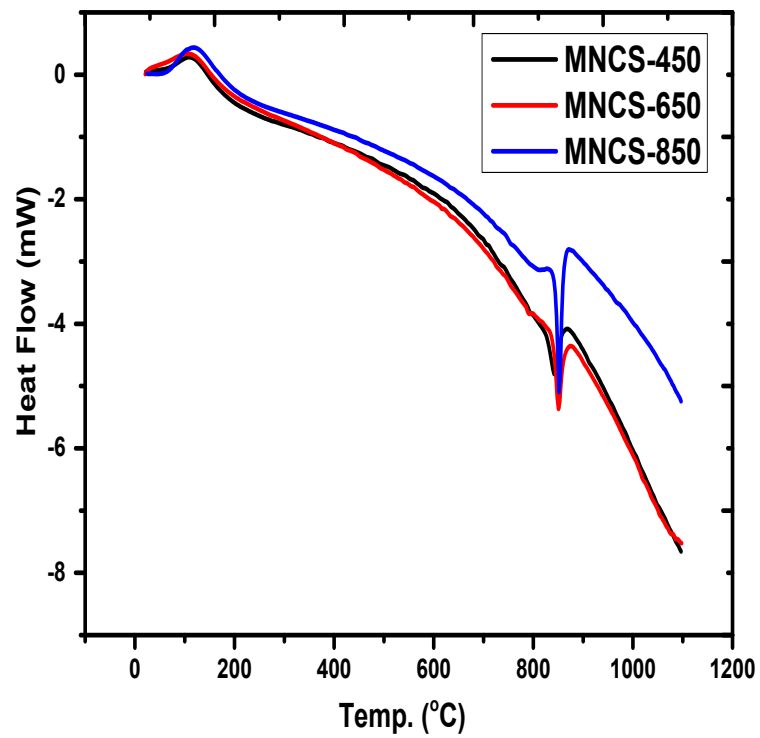

Figure S2: DSC plots for MNCS-450, MNCS-650 and MNCS-850.

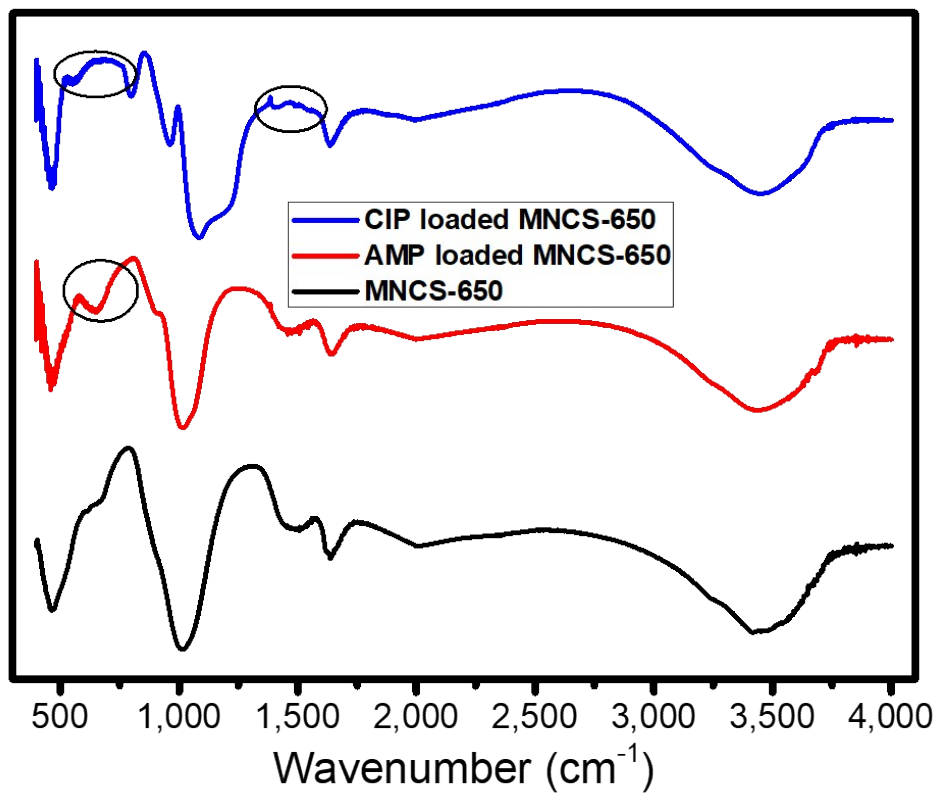

*Figure S3: FTIR spectra for MNCS-650, AMP loaded- MNCS-650 and CIP loaded MNCS-650.*
